1     **A novel comprehensive metric to assess COVID-19 testing outcomes:**  
2                     **Effects of geography, government, and policy response**

3  
4  
5                     Anthony C. Kuster<sup>1</sup>, Hans J. Overgaard<sup>2,3\*</sup>

6  
7  
8     <sup>1</sup>Faculty of Public Health, Khon Kaen University, Khon Kaen, Thailand

9     <sup>2</sup>Faculty of Science and Technology, Norwegian University of Life Sciences, Ås, Norway

10    <sup>3</sup>Department of Microbiology, Faculty of Medicine, Khon Kaen University, Khon Kaen, Thailand

11

12    \*Corresponding author.

13    E-mail: [hans.overgaard@nmbu.no](mailto:hans.overgaard@nmbu.no) (HJO)

14

# 1 Abstract

2 Testing and case identification are key strategies in controlling the COVID-19  
3 pandemic. Contact tracing and isolation are only possible if cases have been identified. The  
4 effectiveness of testing must be tracked, but a single comprehensive metric is not available to  
5 assess testing effectiveness, and no timely estimates of case detection rate are available  
6 globally, making inter-country comparisons difficult. The purpose of this paper was to  
7 propose a single, comprehensive metric, called the COVID-19 Testing Index (CovTI) scaled  
8 from 0 to 100, that incorporated several testing metrics. The index was based on case-fatality  
9 rate, test positivity rate, active cases, and an estimate of the detection rate. It used  
10 parsimonious modeling to estimate the true total number of COVID-19 cases based on deaths,  
11 testing, health system capacity, and government transparency. Publicly reported data from  
12 188 countries and territories were included in the index. Estimates of detection rates aligned  
13 with previous estimates in literature ( $R^2=0.97$ ). As of June 3, 2020, the states with the highest  
14 CovTI included Iceland, Australia, New Zealand, Hong Kong, and Thailand, and some island  
15 nations. Globally, CovTI increased from April 20 ( $\bar{x}=43.2$ ) to June 3 ( $\bar{x}=52.2$ ) but declined in  
16 ca. 10% of countries. Bivariate analyses showed the average in countries with open public  
17 testing policies (59.7, 95% CI 55.6-63.8) were significantly higher than countries with no  
18 testing policy (30.2, 95% CI 18.1-42.3) ( $p<0.0001$ ). A multiple linear regression model  
19 assessed the association of independent grouping variables with CovTI. Open public testing  
20 and extensive contact tracing were shown to significantly increase CovTI, after adjusting for  
21 extrinsic factors, including geographic isolation and centralized forms of government. This  
22 tool may be useful for policymakers to assess testing effectiveness, inform decisions, and  
23 identify model countries. It may also serve as a tool for researchers in analyses by combining  
24 it with other databases.

25

# 1 Introduction

2 Coronavirus disease-2019 (COVID-19) is caused by infection of the Severe Acute  
3 Respiratory Syndrome Coronavirus 2 (SARS-CoV-2). The COVID-19 pandemic has forced many  
4 countries, states, and territories to enact public health measures to reduce its spread, including social  
5 distancing, contact tracing, stay-at-home orders, shuttering of schools, closure of public spaces, and  
6 border closures [1,2].

7 Testing, case identification, and isolation are critical activities to breaking the transmission  
8 chain [3]. Other measures, including social distancing and use of face masks, are also needed [4]. In  
9 order to assess testing and inform decisions about resuming economic activities, many countries  
10 and institutions have tracked testing-related metrics.

11 Thus far, the approach of many countries has generally been to specify several separate  
12 metrics related to testing, such as incidence, test positivity rate, number of hospitalizations, and  
13 mortality rate, with benchmarks for each criteria that are used to justify removing measures in  
14 phases [5,6]. However, many of these metrics rely on cases that have been identified through active  
15 diagnostic testing. One challenge, though, is the substantial proportion of the infected population  
16 that is asymptomatic [7,8]. Consequently, diagnostic testing has been inadequate to reveal what  
17 proportion of the population is infected, with real infections in most countries estimated to be 10 to  
18 15 times, and sometimes even >100 times, higher than the reported number of cases [9–11].  
19 Furthermore, predicating reopening dates on incidence may disincentivize testing, since increased  
20 diagnostic testing will inherently uncover more cases and, thus, delay reopening. Another criticism  
21 is that some criteria, such as the “downward trajectory,” specified by the US Centers for Disease  
22 Control [5], are vague. Thus, metrics used by policymakers and politicians to inform decisions  
23 should not only be quantitative but also encourage widespread proactive testing, such as the  
24 proportion of the total number of infections that have been detected [12]. However, estimating the  
25 detection rate/underreporting is challenging.

1           The level of undetected cases has been estimated with models using transmission  
2 simulations and flight data [13,14]. Generally, these approaches require location-specific inputs,  
3 limiting scalability and transferability. Alternatively, deaths seem to be a good indicator of true  
4 number of COVID-19 infections in the population [15]. Deaths have been used in past pandemics to  
5 estimate the true size of the pandemic given limited case identification [16]. The infection-fatality  
6 rate (IFR) of COVID-19 based on serological testing and comprehensive diagnostic testing has been  
7 shown to be between 0.7% and 1% [17–20], indicating that approximately 100 infections have  
8 occurred to each death. However, factors such as health system capacity, demography, and political  
9 regime impact the IFR [21]. Furthermore, heterogeneity in definitions of COVID-19-related deaths  
10 and testing strategies cause differences in completeness of the death count [22]. Thus, if deaths are  
11 used as an indicator of the true number of infections, adjustments may be necessary for testing,  
12 health system capacity, and government transparency.

13           A single, comprehensive metric that is scalable across all countries and territories would  
14 allow comparisons across states and identify ones most successful in more completely detecting the  
15 presence of infections in the population. It would also allow for statistical techniques, such as  
16 multiple linear regression, so researchers could comprehensively assess policy decisions in  
17 combination with other databases. Comprehensive metrics for COVID-19 and inter-country  
18 comparisons have been developed [23–25], but none that focus exclusively on testing or explicitly  
19 incorporate the true number of infections or detection rate, to the best of the authors' knowledge.  
20 Thus, there is still a need for a single comprehensive metric that can overcome shortcomings in  
21 reported data to assess testing effectiveness during the COVID-19 pandemic.

22           Therefore, a single comprehensive metric that assesses testing effectiveness by  
23 incorporating an estimate of the true total number of COVID-19 infections in the population was  
24 developed using publicly reported data universally accessible across nearly all countries and  
25 territories. Model estimates of true period prevalence and detection rate were validated against  
26 comparable estimates in the literature. The metric was then used to assess factors associated with

1 COVID-19 testing outcomes. We aimed to create a new tool for policymakers and researchers to  
2 comprehensively assess COVID-19 testing outcomes and identify effective policies.

### 3 **Methods and materials**

#### 4 **Data input**

5 Data on COVID-19 were collected from the Worldometer website, which collects data  
6 directly from government communication channels and is managed by an international team of  
7 developers, researchers, and volunteers [26]. The data collected from Worldometer included total  
8 cases (C), total deaths (D), total recovered (R), active cases (A), population (P) (in millions), and  
9 total tests (T). These data have been reported explicitly or implicitly by the website since at least  
10 April 6, 2020. Prior to this date, subsets of these data were available.

11 Two other input data included the Global Health Security Index Detection and Reporting  
12 sub-index ( $I_{sys}$ ) [27] and the Economist Intelligence Unit Democracy Index ( $I_{dem}$ ) [28]. The  $I_{sys}$   
13 assesses a health system's capacity for early detection and reporting during epidemics of potential  
14 international concern. This index is available for 195 countries and has a scale from 0 to 100, where  
15 100 indicates perfect detection and reporting.  $I_{sys}$  values were not available for Hong Kong and  
16 Taiwan. The value for Hong Kong,  $I_{sys}=78$ , was imputed as the average between South Korea  
17 ( $I_{sys}=92.1$ ) and Singapore ( $I_{sys}=64.5$ ), which were assumed to have comparable health systems.  
18 Similarly, the value for Taiwan,  $I_{sys}=81$ , was imputed as average between South Korea ( $I_{sys}=92.1$ )  
19 and Japan ( $I_{sys}=70.1$ ). All other states without a value ( $n=17$ ) were imputed as 42, which was the  
20 global average.  $I_{dem}$  is a projected measure of the degree of democracy; it is calculated for 167  
21 countries and states and has a scale from 0 to 10, where 10 indicates the highest degree of  
22 democracy. This value was assumed to act as a proxy for transparency in data reporting. All states  
23 without a value ( $n=24$ ) were imputed to be 5.4, the global average.

1 Countries and territories were included in the index if at least one case was reported, and the  
2 population was greater than or equal to 100,000. Data were accessed daily; however, this report  
3 presents the results for data accessed as of 00:00 GMT on June 3, 2020 (n=188).

4

## 5 **Definition of key indicators**

6 Several key indicators were computed from the input data, representing important  
7 epidemiological indicators used in the analysis.

8

### 9 **Case Fatality Rate (CFR)**

10 The CFR is the proportion of total deaths,  $D$ , among closed cases (sum of  $D$  and  $R$ ).  
11 However, some countries, including the Netherlands and United Kingdom, have not reported the  
12 number of recoveries, and others have not tracked recoveries in real-time. Additionally, the closed-  
13 case definition of CFR can overestimate the CFR in the early stages of an epidemic because of the  
14 relatively small number of closed cases [29]. Therefore, an alternative estimate of CFR was  
15 calculated as the ratio of deaths,  $D$ , to cases,  $C$ . Logically, the ratio of  $D:C$  is lower than  $D:(D+R)$   
16 because  $C$  includes unresolved cases with unknown outcomes. Linear regression of these two ratios  
17 using data from the Worldometer [26] showed the relationship to be:  $D:(D+R) = 1.99*(D:C)$   
18 ( $R^2=0.58$ ,  $n=178$ ). Thus, the CFR used in our further analysis was the minimum of either the  
19 reported closed-case CFR or 2 times the ratio of  $D:C$  (Eq. 1).

20

$$21 \quad CFR = \min\left(\frac{D}{D+R}, \frac{2D}{C}\right) \quad (1)$$

22

### 23 **Test Positivity Rate (TPR)**

24 TPR was computed as the ratio of cases,  $C$ , to tests,  $T$  (Eq. 2).

25

$$TPR = \frac{C}{T} \quad (2)$$

While the reported number of tests from specific countries or territories may represent multiple tests conducted on a single individual or even number of specimens, no adjustment was attempted to account for such heterogeneity in the various definitions of the TPR. In some cases,  $T$  was not available and thus TPR was not calculated.

### Tests per Capita (TPC)

TPC was computed as the ratio of tests,  $T$ , to population (in millions),  $P$  (Eq. 3).

$$TPC = \frac{T}{P} \quad (3)$$

Similar to TPR, no adjustments were made to account for inter-country heterogeneity in definitions of  $T$ . In cases where  $T$  was not available, TPC was also not available.

### Estimating true number of infections and detection rate

It can be assumed that the reported number of cases,  $C$ , in a country represents a subset of the true number of infections. Some infections will go undetected, but as detection of cases increases,  $C$  will approach the true number of infections. Thus, the true number of infections ( $Inf$ ) is some factor,  $f$ , higher than the cases that have been identified (Eq. 4).

$$Inf = fC \quad (4)$$

We conceptualized this factor,  $f$ , to be a function of the level of testing, the approach to testing (e.g., whether testing focuses on symptomatic, hospitalized, or general populations), and the

1 quality and completeness of the data. We then used the CFR, TPR, TPC,  $I_{sys}$ , and  $I_{dem}$  to formulate  
2 numerical values for  $f$ . Two separate formulations of  $f$  ( $f_1$  and  $f_2$ ) were defined, and the maximum of  
3 each of the two factors was used in the following analysis, as described below.

4

## 5 **Factor 1 ( $f_1$ )**

6 Health system capacity and government transparency affect the completeness of data. To  
7 account for this, two multipliers were constructed:  $m_{sys}$  (Eq. 5) to adjust for the health system  
8 capacity using  $I_{sys}$ —an indicator of a health system’s ability to detect and report cases; and  $m_{dem}$   
9 (Eq. 6) to adjust for government transparency using  $I_{dem}$ —an indicator of government transparency  
10 in reporting data.

$$11 \quad m_{sys} = \frac{100}{10\sqrt{I_{sys}}} = \frac{10}{\sqrt{I_{sys}}} \quad (5)$$

12

$$13 \quad m_{dem} = \frac{100}{10\sqrt{10I_{dem}}} = \frac{10}{\sqrt{10I_{dem}}} \quad (6)$$

14

15 The mathematical relationships between the index and the multiplier in each of these  
16 equations follow declining relationships asymptotic to 1 and the principle that when health system  
17 capacity ( $I_{sys}$ ) or government transparency ( $I_{dem}$ ) are reduced, the multipliers increase, representing  
18 increased underreporting.

19 Additionally, another indicator of underreporting is a high ratio of deaths to cases, D:C. If  
20 all infections have been identified as cases and all cases resolve, then this ratio will approach the  
21 infection fatality rate (IFR), which has been estimated for COVID-19 to be around 1% or less [17].  
22 That is, for every recorded death, at least 100 infections occurred. Thus, if the ratio of 100D:C  
23 exceeded 1, it was used together with  $m_{sys}$  and  $m_{dem}$  to determine  $f_1$ , otherwise 1 was used and  $f_1$   
24 was determined by the product of  $m_{sys}$  and  $m_{dem}$  only (Eq. 7).

25



1 
$$f_1 = m_{sys}m_{dem} \max\left(\frac{100D}{C}, 1\right) \quad (7)$$

2

### 3 **Factor 2 ( $f_2$ )**

4 Inadequate or low testing levels may also affect the completeness of the data. Therefore, a  
5 second factor incorporated data on testing (Eq. 8). This factor was comprised of two multipliers:  
6  $m_{TPR}$  (Eq. 9) based on TPR—an indicator of adequate testing relative to disease prevalence—and  
7  $m_{TPC}$  (Eq. 10) based on TPC—an indicator of adequate testing relative to the population.

8

9 
$$f_2 = m_{TPR}m_{TPC} \quad (8)$$

10

11 The World Health Organization (WHO) has suggested testing capacity is adequate when  
12 TPR is <10% [30]. If TPR is greater than 10%, it was inferred that increasingly more cases were  
13 undetected and that the multiplier  $m_{TPR}$  would be equal to the ratio of the TPR to that 10%  
14 benchmark (Eq. 9).

15 
$$m_{TPR} = \begin{cases} 1 & \text{if } TPR < 10\% \\ \frac{TPR}{0.1} & \text{if } TPR \geq 10\% \end{cases} \quad (9)$$

16

17 It was further assumed that if TPC was greater than 100,000 per million, or 10% of the entire  
18 population, TPC was extensive enough not to contribute to underreporting (i.e.,  $m_{TPC} = 1$ ).  
19 Logically, as TPC decreases, the likelihood of undetected infections increases. The assumed  
20 relationship between the multiplier  $m_{TPC}$  and TPC followed a step-wise logarithmic relationship  
21 (Eq. 10).

22

$$m_{TPC} = \begin{cases} 1 & \text{if } TPC > 100,000 \text{ per million} \\ 1.5 & \text{if } TPC [50,001 - 100,000 \text{ per million}] \\ 2 & \text{if } TPC [25,001 - 50,000 \text{ per million}] \\ 3 & \text{if } TPC [10,001 - 25,000 \text{ per million}] \\ 4 & \text{if } TPC [5001 - 10,000 \text{ per million}] \\ 5 & \text{if } TPC \leq 5000 \text{ per million} \\ 10 & \text{if } TPC \text{ is unknown} \end{cases} \quad (10)$$

2

### 3 **True number of infections**

4 The true number of infections,  $Inf$ , was estimated as the product of  $C$  and the maximum of  
5 the two factors, whichever was highest (Eq. 11).

6

$$7 \quad Inf = fC = \max(f_1, f_2) C \quad (11)$$

8

9 When possible,  $Inf$  was compared against national estimates from other empirical estimates  
10 in literature to validate the model.

11

### 12 **Detection Rate (DR)**

13 With an estimate of the true number of infections, it was possible to estimate what  
14 percentage of the infections (including asymptomatic) have been detected. The total number of  
15 cases,  $C$ , was divided by  $Inf$  to estimate the DR in each country or territory. The inverse of the  
16 factor,  $1/f$ , represents the DR. Estimates of the DR were compared to DRs published in the  
17 literature.

18

### 19 **Calculation of the COVID-19 Testing Index**

20 The COVID-19 Testing Index (CovTI) consists of four sub-indices, each based on a single  
21 key indicator. The key indicators used were the DR, TPR, CFR, and proportion of cases that are  
22 active (i.e.,  $A/C$ ). These indicators were chosen since they are commonly used as metrics and are

1 computable with the methods described above. The relationship between each sub-index and its  
2 indicator was built on two principles. First, each sub-index was scaled from 0 to 100 with 0  
3 representing the worst indicator value and 100 the best indicator value. Second, a square root  
4 mathematical relationship was used to scale the sub-index. A square root function was chosen as a  
5 simplistic way to reflect the complex reality, in which each marginal change of an indicator in the  
6 undesired direction (e.g., increase in TPR or decrease in DR) represents an increasingly higher risk  
7 of an uncontrolled COVID-19 epidemic or a worse testing response. These sub-indices were  
8 combined in a weighted average to compute CovTI.

9

### 10 **Detection Rate sub-index ( $DR_{si}$ )**

11 If infections are undiagnosed, those individuals can actively spread the disease unknowingly.  
12 Without timely diagnosis, effective contact tracing cannot occur. Therefore, undiagnosed infections  
13 critically contribute to unchecked spread of COVID-19 and subsequently represent inadequate  
14 response. Thus,  $DR_{si}$  was given 40% weighting in computing the CovTI (Eq. 16). As the detection  
15 rate decreases, the  $DR_{si}$  decreases (Eq. 12).

16

$$17 \quad DR_{si} = 100\sqrt{C/Inf} \quad (12)$$

18

### 19 **Test Positivity sub-index ( $TP_{si}$ )**

20 The TPR is a commonly used testing metric for COVID-19 [31]. A high TPR represents a  
21 reactive, rather than proactive, approach to testing. Accordingly, as TPR increases, the  $TP_{si}$  decreases  
22 (Eq. 13). If TPR was not available, a dummy value of 20 was used.  $TP_{si}$  was given 20% weighting in  
23 computing the CovTI.

24

$$25 \quad TP_{si} = 100 - 100\sqrt{TPR} \quad (12)$$

26

## 1 **Case-Fatality sub-index ( $CF_{si}$ )**

2 The WHO has suggested that the CFR should be around 1 to 2 percent if the response is  
3 adequate. If CFR is higher, only severely infected patients are being diagnosed. Accordingly, if CFR  
4 increases beyond the minimum benchmark of 2%,  $CF_{si}$  decreases (Eq. 13). If the CFR is less than  
5 2%, the  $CF_{si}$  is 100.  $CF_{si}$  was given 20% weighting. If the CFR was 0%, a dummy value of 50 was  
6 used.

$$8 \quad CF_{si} = \min \left( 100 \sqrt{\frac{0.02}{CFR}}, 100 \right) \quad (14)$$

## 10 **Active Case sub-index ( $AC_{si}$ )**

11 Finally, a fourth sub-index accounts for how active the epidemic is in a country. If the  
12 epidemic is relatively active in the country, it is less likely the testing is adequate, and the increase  
13 reflects inadequate case identification. It provides a metric to incorporate progress as cases resolve.  
14 As the proportion of total cases that are active decreases, it reflects the epidemic is declining and  
15 passing, and the  $AC_{si}$  increases (Eq. 15). It was given a weight of 20%.

$$17 \quad AC_{si} = 100 - 100 \sqrt{\frac{A}{C}} \quad (15)$$

18  
19 In the case of United Kingdom and the Netherlands that do not report  $A$ , the  $AC_{si}$  is not computable.

20 In such cases, a dummy value of 50 was used.

21

## 1 COVID-19 Testing Index (CovTI)

2 The CovTI was calculated as the weighted average of the four sub-indices (Eq. 16) described  
3 above with a heavier weighting given to the  $DR_{si}$  due to the importance of undetected cases in driving  
4 uncontrolled epidemics and because it incorporates several factors into its derivation.

$$5 \quad CovTI = 0.4 DR_{si} + 0.2 TP_{si} + 0.2 CF_{si} + 0.2 AC_{si} \quad (16)$$

## 8 Statistical analyses with CovTI

9 Five independent grouping variables were assessed for their effect on COVID-19 testing  
10 effectiveness by analyzing their association with CovTI (Table 1). Testing and contact tracing  
11 policy status were accessed from the Oxford COVID-19 Government Response Tracker [32] for  
12 May 13, 2020, which is three weeks prior to June 3, 2020, approximately the average time from  
13 symptom onset to death [19]. Islands were defined as any country that is an island, part of an island  
14 (co-island), or has limited land connections (limited land) or archipelago (see details in S1 Table).  
15 Crude bivariate analyses using two-tailed two-sample t-tests and one-way analysis of variance  
16 (ANOVA) were used to test whether the means between groups were different. A multiple linear  
17 regression (MLR) model was developed by using forced entry of all factors with  $p > 0.20$  in crude  
18 analysis. Factors were removed using backwards stepwise method ( $p > 0.05$ ) with Bayesian  
19 Information Criterion (BIC) used to assess model fit and overparameterization. Analyses were  
20 performed in Stata 14 [33].

21  
22 **Table 1. Definitions of grouping variables for multiple linear regression of COVID-19 Testing**  
23 **Index (n=163).**

| Factor (Grouping Variables) | Operational Definition <sup>a</sup> | n (%) |
|-----------------------------|-------------------------------------|-------|
| Testing Policy              |                                     |       |

|                                 |                                                                                                                                                    |            |
|---------------------------------|----------------------------------------------------------------------------------------------------------------------------------------------------|------------|
| No testing policy               | OxCGRT Testing = 0 on May 13, 2020                                                                                                                 | 6 (3.7)    |
| Limited Testing                 | OxCGRT Testing = 1 on May 13, 2020                                                                                                                 | 70 (42.9)  |
| Symptomatic Testing             | OxCGRT Testing = 2 on May 13, 2020                                                                                                                 | 58 (35.6)  |
| Open Public Testing             | OxCGRT Testing = 3 on May 13, 2020                                                                                                                 | 29 (17.8)  |
| <b>Contact Tracing Policy</b>   |                                                                                                                                                    |            |
| No contact tracing              | OxCGRT Contact Tracing = 0 on May 13, 2020                                                                                                         | 19 (11.7)  |
| Limited contact tracing         | OxCGRT Contact Tracing = 1 on May 13, 2020                                                                                                         | 64 (39.3)  |
| Comprehensive contact tracing   | OxCGRT Contact Tracing = 2 on May 13, 2020                                                                                                         | 80 (49.1)  |
| <b>Geographical setting</b>     |                                                                                                                                                    |            |
| Island or island-like nation    | Entirely on island(s) (including Australia) or parts of islands (e.g., Dominican Republic) or have very limited land connections (e.g., Hong Kong) | 28 (17.2)  |
| Non-island nation               | Not meeting the definition of island nation                                                                                                        | 135 (82.8) |
| <b>Form of government</b>       |                                                                                                                                                    |            |
| Authoritarian government        | $I_{dem} < 4$                                                                                                                                      | 48 (29.5)  |
| Non-authoritarian federation    | Constitutionally a federation with $I_{dem} \geq 4$                                                                                                | 17 (10.4)  |
| Non-authoritarian unitary state | Constitutionally not a federation with $I_{dem} \geq 4$                                                                                            | 98 (60.1)  |
| <b>Development status</b>       |                                                                                                                                                    |            |
| OECD <sup>b</sup> member        | Member                                                                                                                                             | 36 (22.1)  |
| Non-OECD member                 | Not a member                                                                                                                                       | 127 (77.9) |

1 <sup>a</sup>OxCGRT = Oxford COVID-19 Government Response Tracker [32]

1 <sup>b</sup>OECD = Organization for Economic Development

## 2 **Results**

### 3 **True number of infections**

4 Globally, the model estimated that approximately 68.2 million people have been infected in  
5 the period prior to June 3, 2020, compared to the reported 6.47 million cases (mean multiplier  
6 factor,  $f$ , =10.5, range = 1.5 to 165). In other words, for every reported case it is estimated that 9.5  
7 infections have gone unreported.

### 9 **Detection rate**

10 Globally, the DR was estimated to be 9.5% (range = 0.6-66.6%). The countries estimated to  
11 have the highest detection rates were Australia, Singapore, Iceland, and Hong Kong (Table 2), each  
12 estimated to have detected at least 50% of all infections.

13  
14 **Table 2. Top 10 countries and territories according to highest implied detection rate (data**  
15 **00:00 GMT June 3, 2020).**

| <b>Global Rank</b> | <b>Country or Territory</b> | <b>Multiplier Factor, <math>f</math></b> | <b>Implied Detection Rate</b> |
|--------------------|-----------------------------|------------------------------------------|-------------------------------|
| 1                  | Australia                   | 1.50                                     | 66.6%                         |
| 2                  | Singapore                   | 1.61                                     | 62.3%                         |
| 3                  | Iceland                     | 1.68                                     | 59.7%                         |
| 4                  | Hong Kong                   | 2.00                                     | 50.0%                         |
| 5                  | Kuwait                      | 2.31                                     | 43.2%                         |
| 6                  | New Zealand                 | 2.51                                     | 39.9%                         |
| 7                  | Israel                      | 2.61                                     | 38.3%                         |

|    |         |      |       |
|----|---------|------|-------|
| 8  | Latvia  | 2.62 | 38.1% |
| 9  | Malta   | 2.84 | 35.2% |
| 10 | Bahrain | 2.93 | 34.2% |

1

## 2 **Comparison to previous estimates**

3 This model's estimates were compared against historical estimates in the literature (Table 3).

4 The results showed that this model's estimates were similar to previous estimates at comparable  
5 time periods ( $R^2=0.97$ ). In many cases the estimates of true number of cases and DR closely  
6 matched previous estimates, and in most cases the estimates were within the 95% confidence  
7 interval of previous estimates.

8

9 **Table 3. Comparison of total cases and detection rate estimates with other similar estimates in**  
10 **literature [34] [35].**

|                          |                | <b>Other Estimates[34][35]</b>                          |                                                | <b>This Study's Estimate</b>               |                                       |
|--------------------------|----------------|---------------------------------------------------------|------------------------------------------------|--------------------------------------------|---------------------------------------|
| <b>Date</b>              | <b>Country</b> | <b>Estimated<br/>Period<br/>Prevalence<br/>[95% CI]</b> | <b>Implied<br/>Detection Rate<br/>[95% CI]</b> | <b>Estimated<br/>Period<br/>Prevalence</b> | <b>Implied<br/>Detection<br/>Rate</b> |
|                          |                | % of total<br>population                                | % of infections                                | % of total<br>population                   | % of<br>infections                    |
| 14 April<br>2020<br>[34] | Australia      | 0.04 [0.03-0.09]                                        | 59 [28-90]                                     | 0.07                                       | 33                                    |
|                          | Canada         | 1.0 [0.67-2.2]                                          | 6.7 [3.1-10]                                   | 0.25                                       | 28                                    |
|                          | South<br>Korea | 0.06 [0.04-0.13]                                        | 35 [16-53]                                     | 0.06                                       | 33                                    |
|                          | USA            | 2.6 [1.7-5.6]                                           | 6.8 [3.2-10]                                   | 1.5                                        | 13                                    |



|                       |               |                  |               |      |      |
|-----------------------|---------------|------------------|---------------|------|------|
| 4 May<br>2020<br>[35] | Austria       | 0.76 [0.59-0.98] | 23.4 [18-30]  | 0.85 | 20   |
|                       | Belgium       | 8.0 [6.1-11]     | 5.4 [3.9-7.1] | 9.7  | 4.4  |
|                       | Denmark       | 1.0 [0.81-1.4]   | 17 [12-21]    | 0.92 | 17.6 |
|                       | France        | 3.4 [2.7-4.3]    | 7.6 [6.0-9.6] | 4.9  | 5.3  |
|                       | Germany       | 0.85 [0.66-1.1]  | 23 [18-30]    | 0.95 | 21   |
|                       | Italy         | 4.6 [3.6-5.8]    | 7.5 [6.0-9.6] | 6.2  | 5.6  |
|                       | Norway        | 0.46 [0.34-0.61] | 32 [24-44]    | 0.51 | 28   |
|                       | Spain         | 5.5 [4.4-7.0]    | 9.6 [7.5-12]  | 6.5  | 8.1  |
|                       | Sweden        | 3.7 [2.8-5.1]    | 6.0 [4.4-8.0] | 2.9  | 7.4  |
|                       | Switzerland   | 1.9 [1.5-2.4]    | 18 [14-23]    | 2.8  | 12.4 |
| UK                    | 5.1 [4.0-6.5] | 5.3 [4.2-6.8]    | 4.8           | 5.6  |      |

1

## 2 COVID-19 Testing Index

### 3 Comparison between Countries

4 Countries in the top quartile of CovTI had lower TPR, lower CFR, lower proportion of  
 5 active cases, and higher DR (Fig 1). The top 10 countries according to the index were dominated by  
 6 island nations and states that are effectively islands (e.g., Hong Kong) (Table 4a). Among non-  
 7 island nations, Thailand, Slovakia, and Israel had the highest CovTI (Table 4b). Full results are  
 8 reported in Supporting Information (S1 and S2 Tables).

9

10 **Fig 1. Comparison of the medians of test positivity rate (TPR), case fatality rate (CFR),**  
 11 **proportion of active cases (AC), and detection rate (DR) among the quartiles of COVID-19**  
 12 **Testing Index (CovTI).** Bottom quartile includes the lowest 25% of CovTI values (n=47), 2<sup>nd</sup>  
 13 quartile includes CovTI values between 25<sup>th</sup> and 50<sup>th</sup> percentiles (n=47), 3<sup>rd</sup> quartile includes CovTI  
 14 values between 50<sup>th</sup> and 75<sup>th</sup> percentiles (n=47), and the top quartile includes highest CovTI values

1 above 75<sup>th</sup> percentile (n=47) . Values in brackets indicate the range of CovTI values in each  
 2 quartile. Error bars represent interquartile range. Data per 00:00 GMT June 3, 2020.

3  
 4 **Table 4. COVID-19 Testing Index (CovTI) and sub-indices a) among all countries and**  
 5 **territories assessed (n=188) and b) among only non-island nations (n=143).**

6 DR<sub>si</sub>, TP<sub>si</sub>, CF<sub>si</sub>, AC<sub>si</sub>, as described in text with percentages indicating degree of weighting. Data per  
 7 00:00 GMT June 3, 2020. Complete data set in S1 Table.

8 **a)**

| <b>Global Rank</b> | <b>Country or Territory</b> | <b>CovTI</b> | <b>DR<sub>si</sub></b><br><b>(40%)</b> | <b>TP<sub>si</sub></b><br><b>(20%)</b> | <b>CF<sub>si</sub></b><br><b>(20%)</b> | <b>AC<sub>si</sub></b><br><b>(20%)</b> |
|--------------------|-----------------------------|--------------|----------------------------------------|----------------------------------------|----------------------------------------|----------------------------------------|
| 1                  | Iceland                     | 86.8         | 77.3                                   | 82.8                                   | 100.0                                  | 96.7                                   |
| 2                  | Australia                   | 86.0         | 81.6                                   | 93.0                                   | 100.0                                  | 73.9                                   |
| 3                  | New Zealand                 | 83.3         | 63.1                                   | 92.7                                   | 100.0                                  | 97.4                                   |
| 4                  | Hong Kong                   | 82.5         | 70.7                                   | 92.7                                   | 100.0                                  | 78.2                                   |
| 5                  | Brunei                      | 76.7         | 50.3                                   | 91.5                                   | 100.0                                  | 91.6                                   |
| 6                  | Malta                       | 75.8         | 59.4                                   | 90.6                                   | 100.0                                  | 69.7                                   |
| 7                  | Thailand                    | 75.5         | 50.0                                   | 91.4                                   | 100.0                                  | 86.2                                   |
| 8                  | Slovakia                    | 74.8         | 55.9                                   | 90.8                                   | 100.0                                  | 71.7                                   |
| 9                  | Israel                      | 74.4         | 61.8                                   | 82.8                                   | 100.0                                  | 65.5                                   |
| 10                 | Taiwan                      | 73.5         | 44.7                                   | 92.2                                   | 100.0                                  | 85.7                                   |

9

10 **b)**

| <b>Global Rank</b> | <b>Country or Territory</b> | <b>CovTI</b> | <b>DR<sub>si</sub></b><br><b>(40%)</b> | <b>TP<sub>si</sub></b><br><b>(20%)</b> | <b>CF<sub>si</sub></b><br><b>(20%)</b> | <b>AC<sub>si</sub></b><br><b>(20%)</b> |
|--------------------|-----------------------------|--------------|----------------------------------------|----------------------------------------|----------------------------------------|----------------------------------------|
| 7                  | Thailand                    | 75.5         | 50.0                                   | 91.4                                   | 100.0                                  | 86.2                                   |

|    |                 |      |      |      |       |       |
|----|-----------------|------|------|------|-------|-------|
| 8  | Slovakia        | 74.8 | 55.9 | 90.8 | 100.0 | 71.7  |
| 9  | Israel          | 74.4 | 61.8 | 82.8 | 100.0 | 65.5  |
| 11 | South Korea     | 73.3 | 57.7 | 88.9 | 88.8  | 73.3  |
| 14 | Malaysia        | 72.6 | 57.7 | 88.1 | 100.0 | 59.5  |
| 16 | Georgia         | 72.1 | 57.7 | 88.4 | 99.8  | 56.7  |
| 17 | Jordan          | 71.6 | 57.7 | 93.8 | 100.0 | 48.9  |
| 18 | Montenegro      | 71.3 | 44.9 | 82.1 | 84.9  | 100.0 |
| 21 | Palestine       | 69.8 | 50.0 | 90.0 | 100.0 | 58.9  |
| 22 | Kyrgyz Republic | 69.1 | 57.7 | 87.3 | 100.0 | 42.5  |

1

## 2 **Temporal Comparison**

3 Comparing the index from April 20 to June 3, the global average of CovTI increased nearly  
 4 10 points from 43.2 to 52.2 (Fig 2). The index in most countries (89.9%) increased over this time  
 5 period. Some countries, such as Australia, increased substantially, while other countries, such as  
 6 Germany and USA, increased comparably to the global average increase. Other countries (10.1%)  
 7 had index values that decreased, including Russia, Canada, and Brazil.

8

9 **Fig 2. Trend of COVID-19 Testing Index among selected countries and groups.** OECD =  
 10 Organization for Economic Cooperation and Development. BRIC = Brazil, Russia, India, and  
 11 China. Shaded grey area represents full range of CovTI values.

12

## 13 **Variable Analysis**

14 Bivariate analyses showed that testing policy and contact tracing policy were significantly  
 15 associated ( $p < 0.0001$ ) with CovTI (Table 5). Additionally, the trend demonstrated that increasing  
 16 levels of testing and contact tracing was associated with improved CovTI. Island nations were  
 17 significantly more effective than non-islands, and significant differences in CovTI were found

1 between forms of government. OECD members had better COVID-19 testing outcomes, but the  
 2 differences were not significant (p=0.11).

3

4 **Table 5. Comparison of differences in COVID-19 Testing Index between countries and states**  
 5 **with different testing and tracing policies, geographical settings, forms of government and**  
 6 **economic development status (n=163).**

| Variable                           | n (%)      | CovTI<br>$\bar{x}$ (95% CI) | Test<br>statistic <sup>a</sup> | p-value |
|------------------------------------|------------|-----------------------------|--------------------------------|---------|
| <b>Testing policy</b>              |            |                             | 10.4                           | <0.0001 |
| No testing policy                  | 6 (3.7)    | 30.2 (18.1-42.3)            |                                |         |
| Limited testing                    | 70 (42.9)  | 49.5 (46.2-52.8)            |                                |         |
| Symptomatic testing                | 58 (35.6)  | 54.7 (51.1-58.2)            |                                |         |
| Open public testing                | 29 (17.8)  | 59.7 (55.6-63.8)            |                                |         |
| <b>Contact tracing policy</b>      |            |                             | 14.5                           | <0.0001 |
| No contact tracing                 | 19 (11.7)  | 40.8 (33.8-47.9)            |                                |         |
| Limited contact tracing            | 64 (39.3)  | 49.7 (46.3-53.1)            |                                |         |
| Extensive contact tracing          | 80 (49.1)  | 57.4 (54.6-60.1)            |                                |         |
| <b>Geographical setting</b>        |            |                             | 3.82                           | 0.0002  |
| Island or island-like              | 28 (17.2)  | 61.4 (55.6-67.2)            |                                |         |
| Non-island                         | 135 (82.8) | 50.6 (48.3-52.9)            |                                |         |
| <b>Form of government</b>          |            |                             | 3.05                           | 0.05    |
| Non-authoritarian unitary state    | 98 (60.1)  | 54.5 (51.8-57.3)            |                                |         |
| Authoritarian government           | 48 (29.4)  | 50.1 (45.8-54.4)            |                                |         |
| Non-authoritarian federation       | 17 (10.4)  | 47.0 (40.4-53.7)            |                                |         |
| <b>Economic development status</b> |            |                             | 1.60                           | 0.11    |

|                 |            |                  |  |  |
|-----------------|------------|------------------|--|--|
| OECD Member     | 36 (22.1)  | 55.8 (50.8-60.7) |  |  |
| Non-OECD Member | 127 (77.9) | 51.5 (49.1-54.0) |  |  |

1 <sup>a</sup> t-statistic from two-way two-sample t-test with equal variance or F-statistic from one-way  
 2 ANOVA

3

4 All factors were entered into the initial MLR model. The final model included all factors  
 5 except economic development. The MLR showed that testing policy had the largest effect on testing  
 6 outcomes, whereby widespread open testing was associated with a 23.8-point increase in CovTI  
 7 compared to no testing policy (Table 6). Contact tracing, centralized governments, and islands were  
 8 also associated with improved CovTI values.

9

10 **Table 6. Multiple linear regression analysis  $F(8, 154) = 9.06$  ( $p < 0.0001$ ), adjusted  $R^2 = 0.28$  of**  
 11 **factors associated with COVID-19 Testing Index from final model (n=163) (Data from 00:00**  
 12 **GMT June 3, 2020).**

| Independent variables         | Mean CovTI<br>(95% CI) | $\beta$ coefficient (change in<br>CovTI associated with factor) | 95% CI    | p value |
|-------------------------------|------------------------|-----------------------------------------------------------------|-----------|---------|
| <b>Constant</b>               |                        | 21.0                                                            |           |         |
| <b>Testing policy</b>         |                        |                                                                 |           |         |
| No testing policy             | 30.2 (18.1-42.3)       | Ref.                                                            |           | <0.0001 |
| Limited testing               | 49.5 (46.2-52.8)       | 14.6                                                            | 4.2-25.0  |         |
| Symptomatic testing           | 54.7 (51.1-58.2)       | 18.8                                                            | 8.3-29.3  |         |
| Open public testing           | 59.7 (55.6-63.8)       | 23.8                                                            | 12.7-34.9 |         |
| <b>Contact tracing policy</b> |                        |                                                                 |           | 0.001   |
| No contact tracing            | 40.8 (33.8-47.9)       | Ref.                                                            |           |         |
| Limited contact tracing       | 49.7 (46.3-53.1)       | 6.2                                                             | -0.2-12.5 |         |

|                                 |                  |      |           |       |
|---------------------------------|------------------|------|-----------|-------|
| Extensive contact tracing       | 57.4 (54.6-60.1) | 11.1 | 4.7-17.4  |       |
| <b>Geographical setting</b>     |                  |      |           | 0.004 |
| Non-island                      | 50.6 (48.3-52.9) | Ref. |           |       |
| Island or island-like           | 61.4 (55.6-67.2) | 7.5  | 2.2-12.7  |       |
| <b>Form of government</b>       |                  |      |           | 0.12  |
| Non-authoritarian federation    | 47.0 (40.4-53.7) | Ref. |           |       |
| Authoritarian government        | 50.1 (45.8-54.4) | 4.1  | -2.6-10.9 |       |
| Non-authoritarian unitary state | 54.5 (51.8-57.3) | 6.4  | -0.1-12.9 |       |

1

## 2 **Discussion**

3 We developed a novel comprehensive metric, entitled the CovTI, that attempts to measure  
4 effectiveness of testing during the COVID-19 pandemic at the country level and is derived from key  
5 epidemiological indicators computable from data available across nearly all countries, as reported  
6 on the Worldometer website and other similar databases [26]. Previous research has assessed  
7 government response [23] and suggested specific indicators to facilitate inter-country comparisons  
8 [24]. However, this is the first published metric to comprehensively assess testing outcomes with a  
9 focus on detection/underreporting. The results showed that testing and contact tracing  
10 independently contribute to better detection and should be used in conjunction with one another.  
11 The results showed that the parsimonious model yielded estimates of true period prevalence  
12 consistent with previous estimates as shown below.

13

### 14 **National testing policy impact on testing outcomes**

15 Testing effectiveness, as indicated by CovTI, was strongly associated with contact tracing  
16 and testing policies. This validates the model's ability to track COVID-19 testing outcomes and

1 further provides confirmation that countries that prioritize policies and dedicate resources  
2 specifically to testing and contact tracing have effectively reduced underreporting and improved  
3 testing-related health outcome metrics, such as the CFR.

4 The results also show that increasingly more inclusive policies for testing (for example,  
5 open public testing vs. symptomatic testing) and contact tracing (e.g., extensive vs. limited) yielded  
6 progressively better detection rates and testing outcomes. Therefore, countries should aim to  
7 increasingly expand these efforts. Additionally, contact tracing and testing independently  
8 contributed to better outcomes, even after adjusting for other factors. Hence, policies should ensure  
9 increased testing is paired with increased contact tracing capacity.

10 High values in the proposed index showed correlation with countries that have been  
11 recognized for their success in responding to the COVID-19 pandemic, including Taiwan,  
12 Australia, Iceland, and South Korea. These countries are recognized for their high testing rates and  
13 comprehensive contact tracing programs [36,37]. Thus, this analysis provided quantitative evidence  
14 supporting policy recommendations to facilitate strong national leadership, expand diagnostic  
15 capacity, rapidly enact comprehensive contact tracing, and proactively test for COVID-19 [36,37].

16

## 17 **Extrinsic factors affecting testing outcomes**

18 This analysis found that island nations had better testing effectiveness outcomes compared  
19 to non-island nations. Geographical isolation is an obvious advantage to controlling infectious  
20 disease [38]. The results also showed an association of higher CovTI with authoritarian and unitary  
21 forms of government. This result suggests an association between better testing outcomes and more  
22 centralized forms of government. Previous research has shown associations between the level of  
23 democracy and CFR, where the time trajectories of CFR increase more steeply for democracies than  
24 for autocracies, i.e. democracies have higher CFR than autocracies [21]. A higher CFR indicates  
25 poorer testing effectiveness, i.e. lower CovTI (Fig 1). Here we show that centralized governments  
26 have higher CovTI and lower CFR, which is consistent with Sorci et al. [21]. Thus, extrinsic factors

1 affect a country's ability to implement testing strategies. Combining this metric with other  
2 databases that can account for other possible factors, such as trust in government institutions,  
3 demographics, or urban/rural distribution, could further elucidate other extrinsic factors related to  
4 COVID-19 testing.

5

## 6 **Estimate of true number of cases and detection rate**

7 A parsimonious empirical model was used to estimate the true number of infections and  
8 inferred detection rate by back-calculating from reported deaths with adjustments for health system  
9 capacity, government transparency, and testing levels. The results were comparable to more  
10 complex modeling approaches based on similar principles [34,35]. The findings suggested that  
11 nearly 90% of global infections remain unreported, which is consistent with previous estimates  
12 showing that true number of infections are many times higher than reported cases [9–11]. In  
13 addition, other authors have used different models to estimate the true number of cases as a  
14 percentage of the population in various European countries. For example, period prevalence in Italy  
15 was estimated at 4 percent in April [39] and 4.4 percent in France in May [40]. Several of the  
16 hardest affected countries early in the pandemic had an estimated period prevalence between 3 and  
17 7.5 percent [41]. These estimates were generally consistent with our estimates (Table 3).

18 Seroprevalence of antibodies is often touted as a reliable means to estimate period  
19 prevalence and past exposure to SARS-CoV-2. Efforts are underway in June 2020 across England,  
20 Germany, and the United States, among others, to randomly sample the population and determine  
21 country-level seroprevalence. However, due to the specificity of the serological tests, false positives  
22 can substantially affect the accuracy of the results[42] Therefore, models and parsimonious  
23 estimates may continue to play an important role in estimating the true number of infections.

24



## 1 **Herd immunity**

2           The estimates of this model further agree with models in the hardest hit countries, such as  
3 Italy or Spain, which estimate that more than five percent of the population in those countries have  
4 been infected [41]. However, such a low proportion of the population presumably with antibodies is  
5 far from conferring herd immunity that may inhibit future disease transmission. It is important to  
6 note that, while these proportions are much higher than the officially reported cases, they do not  
7 represent herd immunity—a concept considered important to fully reopening society. Although  
8 herd immunity depends on the basic reproductive number ( $R_0$ ) [43], which varies with effectiveness  
9 of interventions, some estimates specify a threshold of 50 to 60 percent seroprevalence to achieve  
10 herd immunity [44], while others, accounting for differential susceptibility, estimate the threshold  
11 may be as low as 20 percent [45]. Nevertheless, these estimates suggest that herd immunity is not  
12 yet occurring at the national level of the countries analyzed.

## 14 **Excess deaths**

15           Reported deaths are an important indicator. However, excess deaths (i.e., total mortality in  
16 excess of seasonal averages) are substantially higher than the reported COVID-19 deaths in many  
17 locations, including Brazil, Jakarta, New York City, and Ecuador [46]. These excess deaths suggest  
18 such locations have not accurately captured deaths related to COVID-19 in official figures [47].  
19 Different definitions of attributable deaths substantially affect data. For example, Russia had  
20 previously used a very limited definition for inclusion determined via autopsy that does not count  
21 many deaths even if the patient previously tested positive for SARS-CoV-2 [48]. On the other hand,  
22 some countries have opted to exhaustively include any presumptive death to COVID-19 in official  
23 data. Belgium has included unconfirmed deaths within their COVID-19 death total [49]. In such a  
24 case, COVID-19 deaths are greater than excess deaths [46]. These examples of limited or  
25 conservative death definitions impact this model's estimates. Nevertheless, substantial differences  
26 between excess deaths and deaths attributed to COVID-19 may indicate insufficient testing or

1 policy decisions that systematically exclude some deaths. While proxy factors, including the  
2 adjustments for government transparency and health system capacity, were included to mitigate this  
3 factor, it is likely the model estimates will not sufficiently adjust in cases of excessive deaths across  
4 such wide ranging scenarios. Including data on excessive deaths could improve the validity of the  
5 model; however, such data is usually reported with a lag of several weeks or not reported at all.

## 7 **Sources of uncertainty**

8 Several assumptions were made to generate this model. Most notably, the model assumes  
9 specific and universal relationships between deaths and total number of infections, implying an  
10 inherent IFR. Advances in therapeutics and differences in health system capacity will influence this  
11 rate, though [21]. In addition, several factors including age, sex, hypertension, diabetes, and blood  
12 groups are known to affect the mortality and hospitalization rates [50–56]. Future analyses may  
13 combine CovTI with databases that include these factors. The model also assumes specific  
14 relationships between proxy indicators, such as the Global Health Security Index and Democracy  
15 Index, and data outcomes. While the direction of the relationship is arguably evident, the magnitude  
16 and shape of the relationship is unknown. Furthermore, this model aims to be parsimonious (i.e.,  
17 not introducing excessive parameters or uncertainty) and is, by nature, deterministic. The decision  
18 to include a minimum number of variables and data was strategic, but a stochastic approach could  
19 better illustrate the uncertainty and sensitivity to the above assumptions. The model also reported  
20 estimates of total number of cases and detection rates. These values should be used cautiously as a  
21 comparative tool, rather than exact values.

## 22 **Conclusion**

23 This report described a novel comprehensive metric (COVID-19 Testing Index, CovTI) that  
24 evaluates the overall effectiveness of COVID-19 testing in the current pandemic using real-time  
25 publicly reported data among 188 countries and territories. The metric incorporated case-fatality

1 rate, test positivity rate, proportion of active cases, and an estimate of detection rate based upon  
2 reported death data by adjusting for heterogeneity in testing levels, health system capacity, and  
3 government transparency. The estimated detection rate of COVID-19 aligned satisfactorily with  
4 previous empirical and epidemiological models. National policies that allow open public testing and  
5 extensive contact tracing were significantly associated with higher values of CovTI, which reflects  
6 improvements in the estimated detection rate. Extrinsic factors, including geographic isolation and  
7 centralized forms of government, were also shown to be associated with higher COVID-19 testing  
8 outcomes. Countries should commit to expanding policies on testing and contact tracing in order to  
9 reduce levels of undetected infections and reduce disease transmission. Applications of this metric  
10 include combining it with different databases to identify other factors that affect testing outcomes or  
11 using it to temporally track a holistic measure of testing outcomes at the national level.

## 12 **References**

- 13 1. Nicola M, O'Neill N, Sohrabi C, Khan M, Agha M, Agha R. Evidence based management  
14 guideline for the COVID-19 pandemic - Review article. *Int J Surg.* 2020;77: 206–216.  
15 doi:10.1016/j.ijssu.2020.04.001
- 16 2. Ebrahim SH, Ahmed QA, Gozzer E, Schlagenhaut P, Memish ZA. Covid-19 and community  
17 mitigation strategies in a pandemic. *BMJ.* 2020;368. doi:10.1136/bmj.m1066
- 18 3. World Health Organization. World Health Organization. Critical preparedness, readiness and  
19 response actions for COVID-19 (Interim Guidance). 2020. Available:  
20 [https://www.who.int/publications-detail/critical-preparedness-readiness-and-response-](https://www.who.int/publications-detail/critical-preparedness-readiness-and-response-actions-for-covid-19)  
21 [actions-for-covid-19](https://www.who.int/publications-detail/critical-preparedness-readiness-and-response-actions-for-covid-19)
- 22 4. Chu DK, Akl EA, Duda S, Solo K, Yaacoub S, Schünemann HJ, et al. Physical distancing,  
23 face masks, and eye protection to prevent person-to-person transmission of SARS-CoV-2  
24 and COVID-19: a systematic review and meta-analysis. *Lancet.* 2020. doi:10.1016/S0140-  
25 6736(20)31142-9

- 1 5. US CDC. CDC Activities and Initiatives Supporting the COVID-19 Response and the  
2 President's Plan for Opening America Up Again. 2020. Available:  
3 [https://www.cdc.gov/coronavirus/2019-ncov/downloads/php/CDC-Activities-Initiatives-for-  
5 COVID-19-Response.pdf](https://www.cdc.gov/coronavirus/2019-ncov/downloads/php/CDC-Activities-Initiatives-for-<br/>4 COVID-19-Response.pdf)
- 5 6. UK Government. Our plan to rebuild: The UK Government's COVID-19 recovery strategy.  
6 2020. Available: [https://www.gov.uk/government/publications/our-plan-to-rebuild-the-uk-  
8 governments-covid-19-recovery-strategy](https://www.gov.uk/government/publications/our-plan-to-rebuild-the-uk-<br/>7 governments-covid-19-recovery-strategy)
- 8 7. Mizumoto K, Kagaya K, Zarebski A, Chowell G. Estimating the asymptomatic proportion of  
9 coronavirus disease 2019 (COVID-19) cases on board the Diamond Princess cruise ship,  
10 Yokohama, Japan, 2020. *Euro Surveill Bull Eur sur les Mal Transm = Eur Commun Dis  
11 Bull.* 2020;25. doi:10.2807/1560-7917.ES.2020.25.10.2000180
- 12 8. Gandhi M, Yokoe DS, Havlir D V. Asymptomatic Transmission, the Achilles' Heel of  
13 Current Strategies to Control Covid-19. *N Engl J Med.* 2020;382: 2158–2160.  
14 doi:10.1056/NEJMe2009758
- 15 9. Benatia D, Godefroy R, Lewis J. Estimating COVID-19 Prevalence in the United States: A  
16 Sample Selection Model Approach. *medRxiv.* 2020; 2020.04.20.20072942.  
17 doi:10.1101/2020.04.20.20072942
- 18 10. Lu FS, Nguyen AT, Link N, Santillana M. Estimating the Prevalence of COVID-19 in the  
19 United States: Three Complementary Approaches. *medRxiv.* 2020; 2020.04.18.20070821.  
20 doi:10.1101/2020.04.18.20070821
- 21 11. Krantz SG, Rao ASRS. Level of underreporting including underdiagnosis before the first  
22 peak of COVID-19 in various countries: Preliminary retrospective results based on wavelets  
23 and deterministic modeling. *Infect Control Hosp Epidemiol.* 2020; 1–3.  
24 doi:10.1017/ice.2020.116
- 25 12. Boehning D, Rocchetti I, Maruotti A, Holling H. Estimating the undetected infections in the  
26 Covid-19 outbreak by harnessing capture-recapture methods. *medRxiv.* 2020;

- 1 2020.04.20.20072629. doi:10.1101/2020.04.20.20072629
- 2 13. Tuite AR, Ng V, Rees E, Fisman D. Estimation of COVID-19 outbreak size in Italy. *Lancet*  
3 *Infect Dis.* 2020;20: 537. doi:10.1016/S1473-3099(20)30227-9
- 4 14. Giordano G, Blanchini F, Bruno R, Colaneri P, Di Filippo A, Di Matteo A, et al. Modelling  
5 the COVID-19 epidemic and implementation of population-wide interventions in Italy. *Nat*  
6 *Med.* 2020. doi:10.1038/s41591-020-0883-7
- 7 15. Subbaraman N. Why daily death tolls have become unusually important in understanding the  
8 coronavirus pandemic. *Nature.* England; 2020. doi:10.1038/d41586-020-01008-1
- 9 16. Fraser C, Donnelly CA, Cauchemez S, Hanage WP, Van Kerkhove MD, Hollingsworth TD,  
10 et al. Pandemic potential of a strain of influenza A (H1N1): early findings. *Science.*  
11 2009;324: 1557–1561. doi:10.1126/science.1176062
- 12 17. Meyerowitz-Katz G, Merone L. A systematic review and meta-analysis of published research  
13 data on COVID-19 infection-fatality rates. *medRxiv.* 2020; 2020.05.03.20089854.  
14 doi:10.1101/2020.05.03.20089854
- 15 18. Ing AJ, Cocks C, Green JP. COVID-19: in the footsteps of Ernest Shackleton. *Thorax.* 2020;  
16 *thoraxjnl-2020-215091.* doi:10.1136/thoraxjnl-2020-215091
- 17 19. Verity R, Okell LC, Dorigatti I, Winskill P, Whittaker C, Imai N, et al. Estimates of the  
18 severity of coronavirus disease 2019: a model-based analysis. *Lancet Infect Dis.* 2020;20:  
19 669–677. doi:10.1016/S1473-3099(20)30243-7
- 20 20. Russell TW, Hellewell J, Jarvis CI, van Zandvoort K, Abbott S, Ratnayake R, et al.  
21 Estimating the infection and case fatality ratio for coronavirus disease (COVID-19) using  
22 age-adjusted data from the outbreak on the Diamond Princess cruise ship, February 2020.  
23 *Eurosurveillance.* 2020;25. doi:<https://doi.org/10.2807/1560-7917.ES.2020.25.12.2000256>
- 24 21. Sorci G, Faivre B, Morand S. Why does COVID-19 case fatality rate vary among countries?  
25 *medRxiv.* 2020; 2020.04.17.20069393. doi:10.1101/2020.04.17.20069393
- 26 22. Onder G, Rezza G, Brusaferro S. Case-Fatality Rate and Characteristics of Patients Dying in

- 1 Relation to COVID-19 in Italy. *JAMA*. 2020;323: 1775–1776. doi:10.1001/jama.2020.4683
- 2 23. D’Souza C. GRID Index 2: Ostrich Leadership and Ostrich Reactions. In: On Target
- 3 [Internet]. 2020 [cited 7 Jun 2020]. Available: [https://www.cmaweblines.org/ontarget/grid-](https://www.cmaweblines.org/ontarget/grid-index-2-ostrich-leadership-and-ostrich-reactions/)
- 4 [index-2-ostrich-leadership-and-ostrich-reactions/](https://www.cmaweblines.org/ontarget/grid-index-2-ostrich-leadership-and-ostrich-reactions/)
- 5 24. Middelburg RA, Rosendaal FR. COVID-19: how to make between-country comparisons. *Int*
- 6 *J Infect Dis*. 2020; S1201-9712(20)30373–8. doi:10.1016/j.ijid.2020.05.066
- 7 25. Gibney E. Whose coronavirus strategy worked best? Scientists hunt most effective policies.
- 8 *Nature*. 2020;15–16. doi:10.1038/d41586-020-01248-1
- 9 26. Worldometer. COVID-19 Coronavirus Pandemic. 2020 [cited 3 Jun 2020]. Available:
- 10 <https://www.worldometers.info/coronavirus/>
- 11 27. GHSI. Global Health Security Index. 2019 [cited 1 Jun 2020]. Available:
- 12 <https://www.ghsindex.org>
- 13 28. EIU. Democracy Index 2019. 2019 [cited 1 Jun 2020]. Available:
- 14 <https://www.eiu.com/topic/democracy-index>
- 15 29. Spychalski P, Błażyńska-Spychalska A, Kobiela J. Estimating case fatality rates of COVID-
- 16 19. *The Lancet. Infectious diseases*. Elsevier; 2020. doi:10.1016/S1473-3099(20)30246-2
- 17 30. Stein R, Wroth C, Hurt A. U.S. Coronavirus Testing Still Falls Short. How’s Your State
- 18 Doing? In: NPR [Internet]. 2020 [cited 7 Jun 2020]. Available:
- 19 [https://www.npr.org/sections/health-shots/2020/05/07/851610771/u-s-coronavirus-testing-](https://www.npr.org/sections/health-shots/2020/05/07/851610771/u-s-coronavirus-testing-still-falls-short-hows-your-state-doing)
- 20 [still-falls-short-hows-your-state-doing](https://www.npr.org/sections/health-shots/2020/05/07/851610771/u-s-coronavirus-testing-still-falls-short-hows-your-state-doing)
- 21 31. Johns Hopkins University. Which U.S. States Meet WHO Recommended Testing Criteria?
- 22 2020 [cited 6 Jun 2020]. Available: <https://coronavirus.jhu.edu/testing/testing-positivity>
- 23 32. Hale T, Webster S, Petherick A, Phillips T, Kira B. Oxford COVID-19 Government
- 24 Response Tracker. In: Blavatnik School of Government [Internet]. 2020 [cited 10 Jun 2020].
- 25 Available: [https://www.bsg.ox.ac.uk/research/research-projects/coronavirus-government-](https://www.bsg.ox.ac.uk/research/research-projects/coronavirus-government-response-tracker)
- 26 [response-tracker](https://www.bsg.ox.ac.uk/research/research-projects/coronavirus-government-response-tracker)

- 1 33. StataCorp. Stata Statistical Software: Release 14. College Station, TX: StataCorp LP; 2015.
- 2 34. Phipps SJ, Grafton RQ, Kompas T. Estimating the true (population) infection rate for  
3 COVID-19: A Backcasting Approach with Monte Carlo Methods. medRxiv. 2020;  
4 2020.05.12.20098889. doi:10.1101/2020.05.12.20098889
- 5 35. Flaxman S, Mishra S, Gandy A, Unwin HJT, Mellan TA, Coupland H, et al. Estimating the  
6 effects of non-pharmaceutical interventions on COVID-19 in Europe. Nature. 2020.  
7 doi:10.1038/s41586-020-2405-7
- 8 36. Oh J, Lee J-K, Schwarz D, Ratcliffe HL, Markuns JF, Hirschhorn LR. National Response to  
9 COVID-19 in the Republic of Korea and Lessons Learned for Other Countries. Heal Syst  
10 reform. 2020;6: e1753464. doi:10.1080/23288604.2020.1753464
- 11 37. Sen-Crowe B, McKenney M, Elkbuli A. COVID-19 response and containment strategies in  
12 the US, South Korea, and Iceland: Lessons learned and future directions. The American  
13 journal of emergency medicine. 2020. doi:10.1016/j.ajem.2020.04.072
- 14 38. Ryall J. Zero cases: How Pacific islands kept coronavirus at bay. In: Deutsche Welle  
15 [Internet]. 2020 [cited 7 Jun 2020]. Available: [https://www.dw.com/en/zero-cases-how-](https://www.dw.com/en/zero-cases-how-pacific-islands-kept-coronavirus-at-bay/a-53495263)  
16 [pacific-islands-kept-coronavirus-at-bay/a-53495263](https://www.dw.com/en/zero-cases-how-pacific-islands-kept-coronavirus-at-bay/a-53495263)
- 17 39. Signorelli C, Scognamiglio T, Odone A. COVID-19 in Italy: impact of containment  
18 measures and prevalence estimates of infection in the general population. Acta Biomed.  
19 2020;91: 175–179. doi:10.23750/abm.v91i3-S.9511
- 20 40. Salje H, Tran Kiem C, Lefrancq N, Courtejoie N, Bosetti P, Paireau J, et al. Estimating the  
21 burden of SARS-CoV-2 in France. Science (80- ). 2020; eabc3517.  
22 doi:10.1126/science.abc3517
- 23 41. Ketcheson DI, Ombao HC, Moraga P, Ballal T, Duarte CM. Estimating and forecasting  
24 COVID-19 attack rates and mortality. medRxiv. 2020; 2020.05.11.20097972.  
25 doi:10.1101/2020.05.11.20097972
- 26 42. Frasier SL. False Positive Alarm. Sci Am. 2020;323: 12–13.

- 1           doi:10.1038/scientificamerican0720-12
- 2   43.   Randolph HE, Barreiro LB. Herd Immunity: Understanding COVID-19. *Immunity*. 2020;52:  
3       737–741. doi:<https://doi.org/10.1016/j.immuni.2020.04.012>
- 4   44.   Dimeglio C, Loubes J-M, Deporte B, Dubois M, Latour J, Mansuy J-M, et al. The SARS-  
5       CoV-2 seroprevalence is the key factor for deconfinement in France. *J Infect*. 2020; S0163-  
6       4453(20)30242–5. doi:10.1016/j.jinf.2020.04.031
- 7   45.   Gomes MGM, Corder RM, King JG, Langwig KE, Souto-Maior C, Carneiro J, et al.  
8       Individual variation in susceptibility or exposure to SARS-CoV-2 lowers the herd immunity  
9       threshold. *medRxiv*. 2020; 2020.04.27.20081893. doi:10.1101/2020.04.27.20081893
- 10 46.   Wu J, McCann A, Katz J, Elian Peltier. 109,000 Missing Deaths: Tracking the True Toll of  
11       the Coronavirus Outbreak. In: *New York Times* [Internet]. 2020 [cited 9 Jun 2020].  
12       Available: [https://www.nytimes.com/interactive/2020/04/21/world/coronavirus-missing-](https://www.nytimes.com/interactive/2020/04/21/world/coronavirus-missing-deaths.html)  
13       [deaths.html](https://www.nytimes.com/interactive/2020/04/21/world/coronavirus-missing-deaths.html)
- 14 47.   Docherty K, Butt J, de Boer R, Dewan P, Koeber L, Maggioni A, et al. Excess deaths during  
15       the Covid-19 pandemic: An international comparison. *medRxiv*. 2020;  
16       2020.04.21.20073114. doi:10.1101/2020.04.21.20073114
- 17 48.   Sauer P, Gershkovich E. Russia Is Boasting About Low Coronavirus Deaths. The Numbers  
18       Are Deceiving. In: *The Moscow Times* [Internet]. 2020 [cited 7 Jun 2020]. Available:  
19       [https://www.themoscowtimes.com/2020/05/08/russia-is-boasting-about-low-coronavirus-](https://www.themoscowtimes.com/2020/05/08/russia-is-boasting-about-low-coronavirus-deaths-the-numbers-are-deceiving-a70220)  
20       [deaths-the-numbers-are-deceiving-a70220](https://www.themoscowtimes.com/2020/05/08/russia-is-boasting-about-low-coronavirus-deaths-the-numbers-are-deceiving-a70220)
- 21 49.   Schultz T. Why Belgium’s Death Rate Is So High: It Counts Lots Of Suspected COVID-19  
22       Cases. In: *NPR* [Internet]. 2020 [cited 7 Jun 2020]. Available:  
23       [https://www.npr.org/sections/coronavirus-live-updates/2020/04/22/841005901/why-](https://www.npr.org/sections/coronavirus-live-updates/2020/04/22/841005901/why-belgiums-death-rate-is-so-high-it-counts-lots-of-suspected-covid-19-cases)  
24       [belgiums-death-rate-is-so-high-it-counts-lots-of-suspected-covid-19-cases](https://www.npr.org/sections/coronavirus-live-updates/2020/04/22/841005901/why-belgiums-death-rate-is-so-high-it-counts-lots-of-suspected-covid-19-cases)
- 25 50.   Zietz M, Tatonetti NP. Testing the association between blood type and COVID-19 infection,  
26       intubation, and death. *medRxiv*. 2020; 2020.04.08.20058073.



- 1           doi:10.1101/2020.04.08.20058073
- 2   51.   Du R-H, Liang L-R, Yang C-Q, Wang W, Cao T-Z, Li M, et al. Predictors of mortality for  
3       patients with COVID-19 pneumonia caused by SARS-CoV-2: a prospective cohort study.  
4       *Eur Respir J.* 2020;55: 2000524. doi:10.1183/13993003.00524-2020
- 5   52.   Menter T, Haslbauer JD, Nienhold R, Savic S, Hopfer H, Deigendesch N, et al. Post-mortem  
6       examination of COVID19 patients reveals diffuse alveolar damage with severe capillary  
7       congestion and variegated findings of lungs and other organs suggesting vascular  
8       dysfunction. *Histopathology.* 2020;n/a. doi:10.1111/his.14134
- 9   53.   Madjid M, Safavi-Naeini P, Solomon SD, Vardeny O. Potential Effects of Coronaviruses on  
10      the Cardiovascular System: A Review. *JAMA Cardiol.* 2020.  
11      doi:10.1001/jamacardio.2020.1286
- 12   54.   Gérard C, Maggipinto G, Minon J-M. COVID-19 and ABO blood group: another viewpoint.  
13      *Br J Haematol.* 2020;n/a. doi:10.1111/bjh.16884
- 14   55.   Li J, Wang X, Chen J, Cai Y, Deng A, Yang M. Association between ABO blood groups and  
15      risk of SARS-CoV-2 pneumonia. *Br J Haematol.* 2020;n/a. doi:10.1111/bjh.16797
- 16   56.   Zheng Z, Peng F, Xu B, Zhao J, Liu H, Peng J, et al. Risk factors of critical & mortal  
17      COVID-19 cases: A systematic literature review and meta-analysis. *J Infect.* 2020.  
18      doi:10.1016/j.jinf.2020.04.021

19

## 20   **Supporting information**

21   **S1 Table. Raw data inputs and computed values for the COVID-19 Testing Index (CovTI) on June 3,**  
22   **2020.** Raw data inputs, key epidemiological indicators, multipliers, factors, and sub-indices used to compute  
23   CovTI on June 3, 2020 among eligible countries and territories (n=188). Further details of each variable are  
24   described in the text. C=cases, D=total deaths, R=total recovered, A=active cases, P= population (in  
25   millions), T=total tests, CFR=case fatality rate, TPR=test positivity rate, TPC=tests per capita,  $m_{sys}$ =health

1 system capacity multiplier,  $m_{dem}$ = democracy multiplier,  $m_{TPR}$ = test positivity rate multiplier,  $m_{TPC}$ = per  
2 capita testing multiplier.  $f_1$ =factor 1,  $f_2$ =factor 2,  $Inf$ = true number of infections,  $Prev$ =Estimated Period  
3 Prevalence =  $Inf / P$ ,  $Act$ =proportion active cases= $A/C$ ,  $DR$ =detection rate,  $DR_{si}$ = Detection Rate sub-index,  
4  $TP_{si}$ =Test Positivity sub-index,  $CF_{si}$ = Case-Fatality sub-index  $AC_{si}$ = Active Case sub-index,  
5  $CovTI$ =COVID-19 Testing Index. OECD= Organization for Economic Development member, BRIC=  
6 Brazil, Russia, India, and China.

7  
8 **S2 Table. Dataset for bivariate and multiple linear regression analyses.**  $CovTI$  as of June 3,  
9 2020; island status; form of government; OECD membership; COVID-19 testing policy as of May  
10 13, 2020; and COVID-19 contact tracing policy as of May 13, 2020 among eligible countries and  
11 territories with complete data (n=163). Further details of each variable are described in the text.

■ TPR ■ CFR ■ AC ■ DR

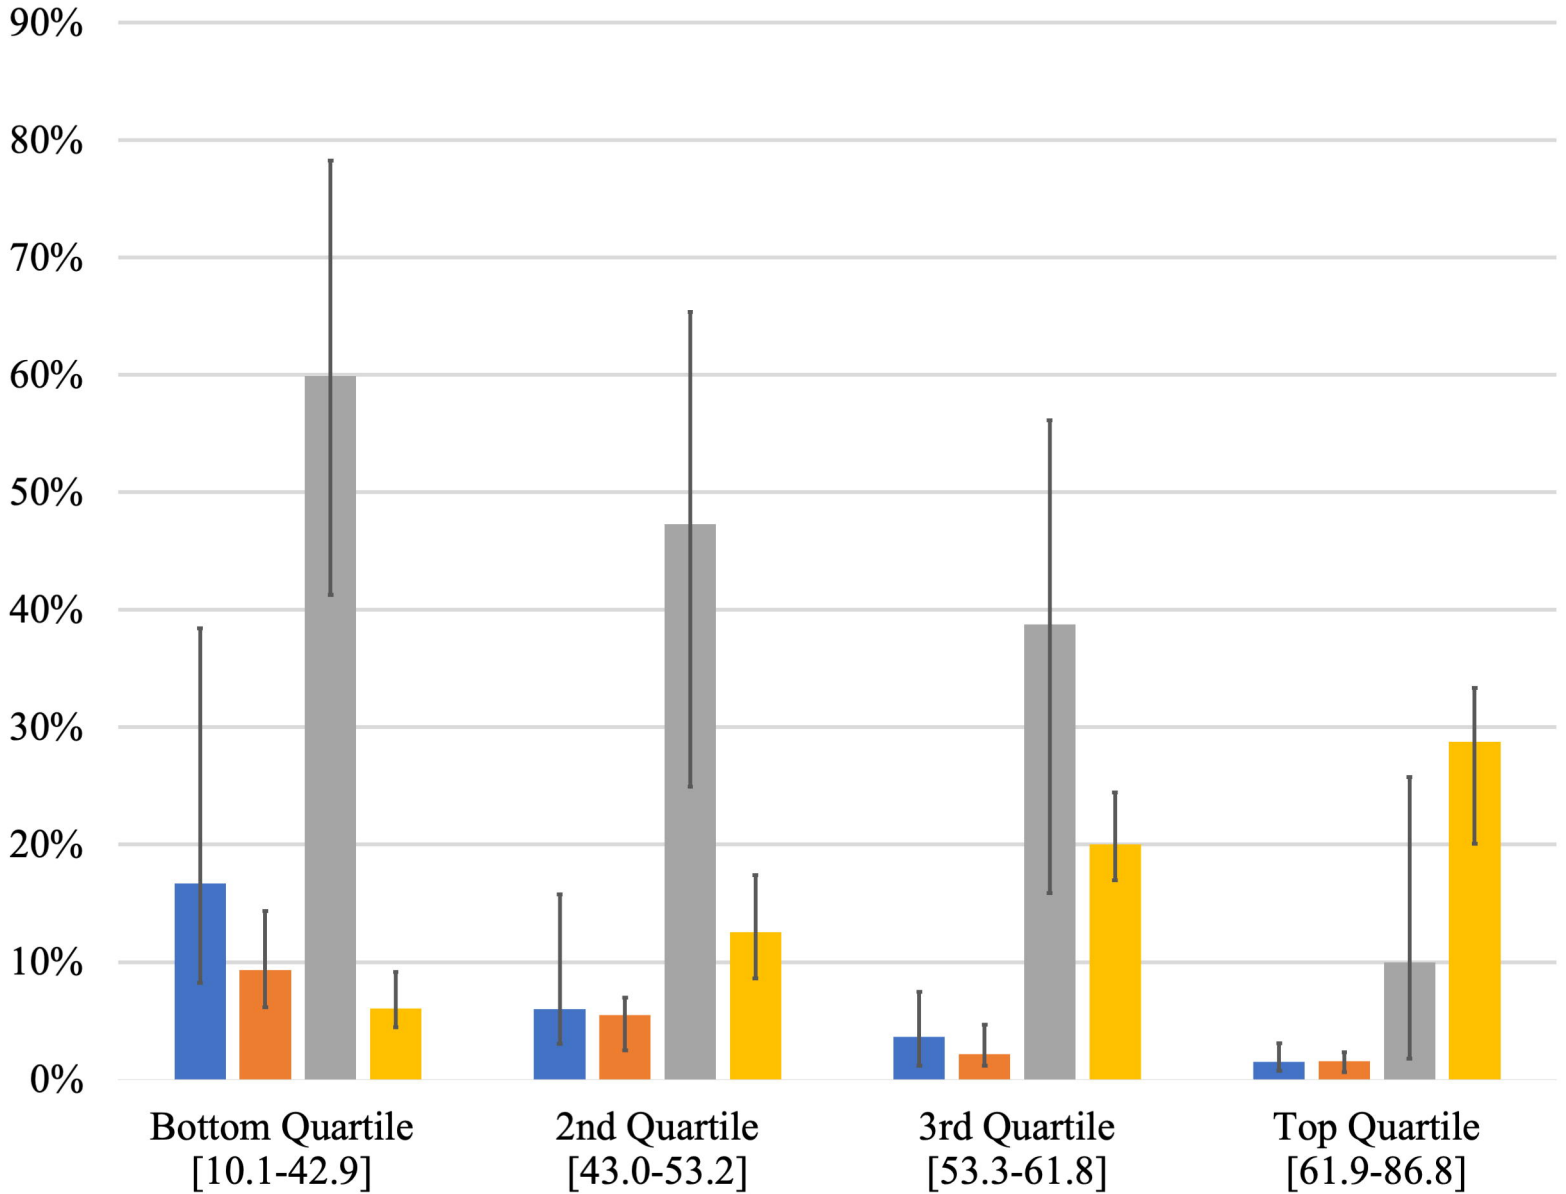

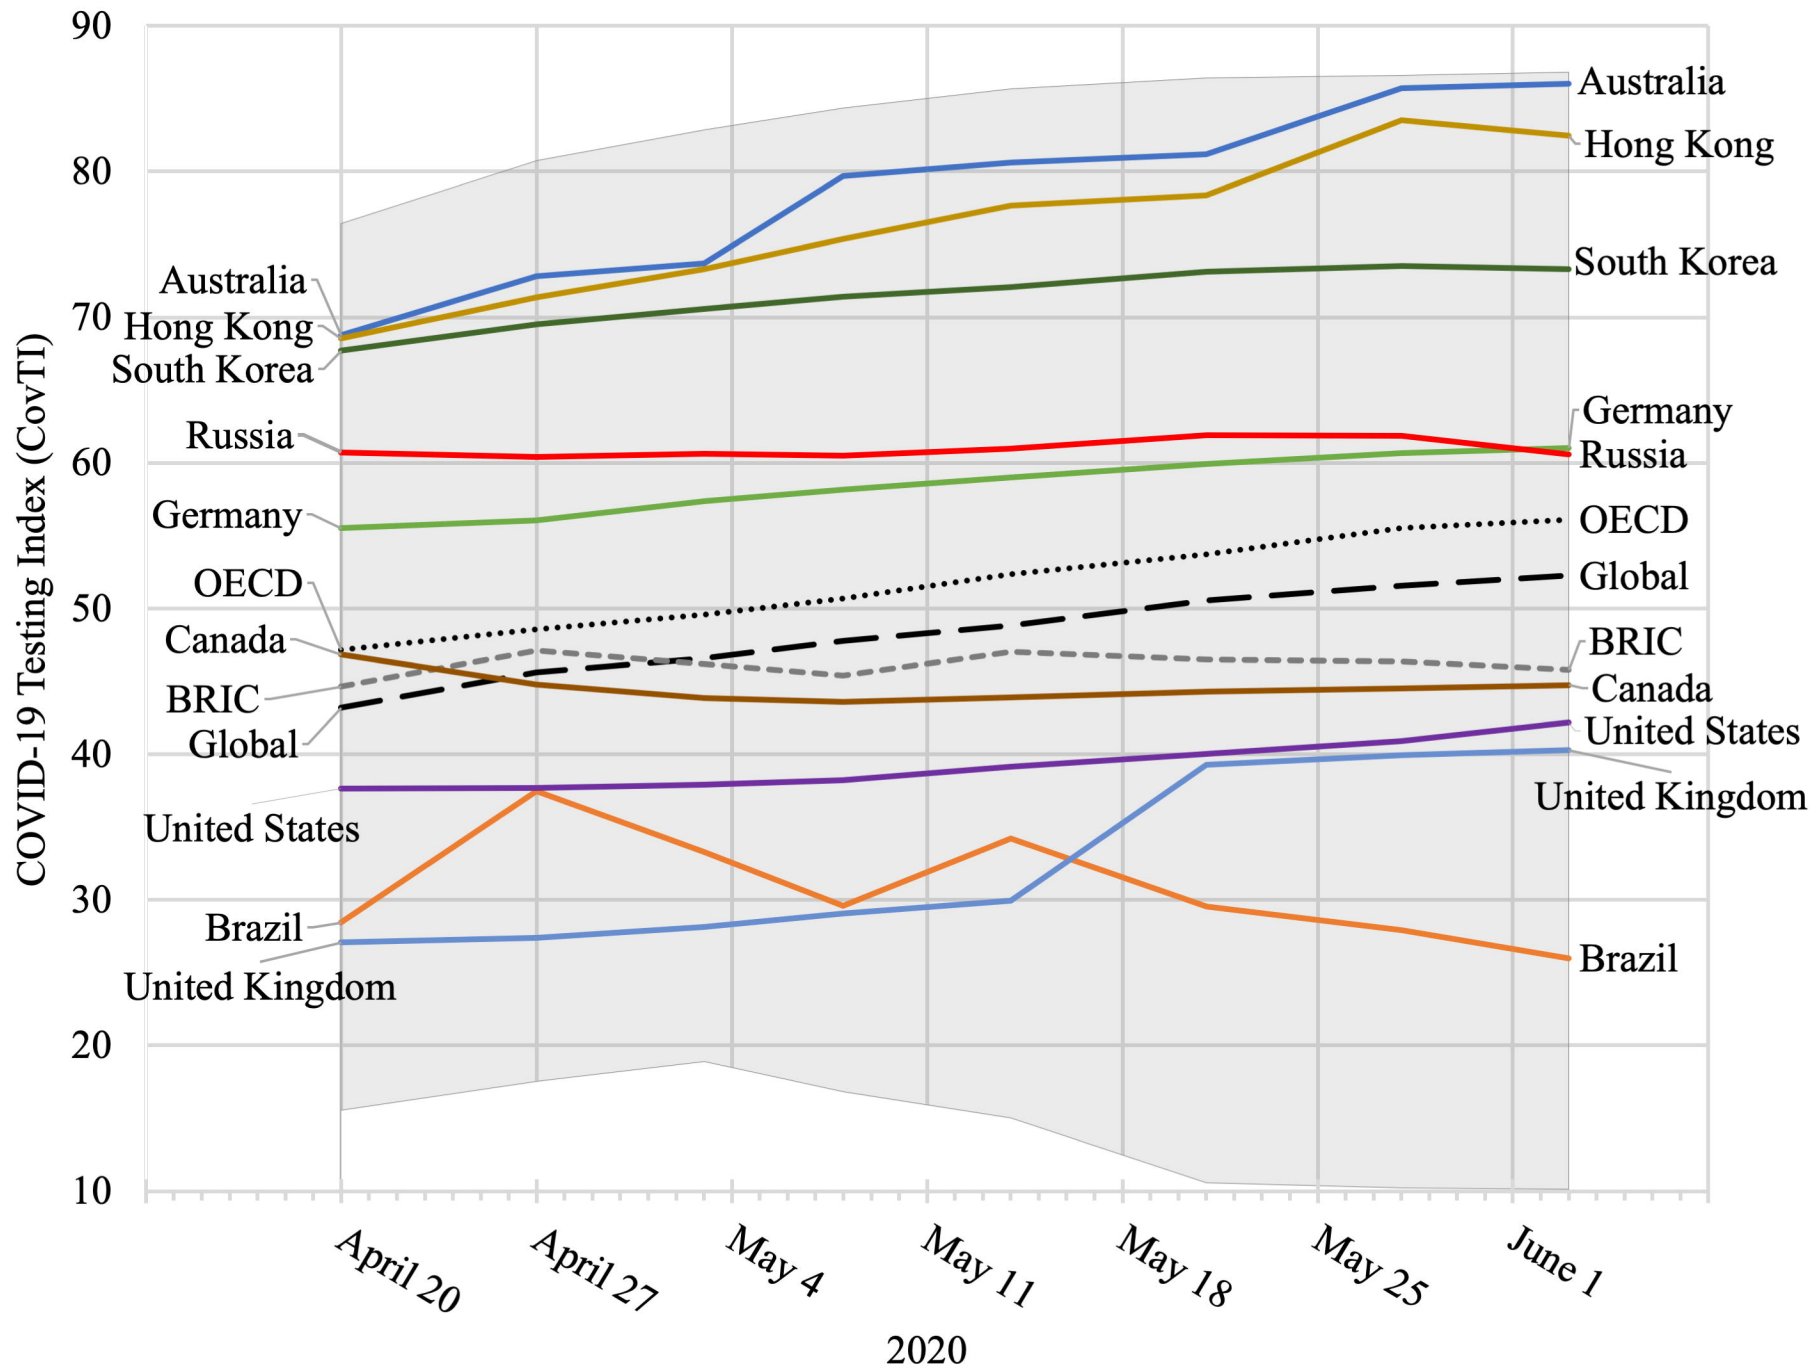

Source: https://www.medrxiv.org/content/medrxiv/early/2020/06/19/2020.06.17.20133389.full.pdf
